# Supplementary material for: Adsorption of O2 on anionic silver clusters: spins and electron binding energies dominate in the range up to nano sizes
Source: Royal Society of Chemistry journal article supplement (doi:10.1039/c5cp06116d), 2015-11-12

# Adsorption of O<sub>2</sub> on Anionic Silver Clusters: Spins and Electron Binding Energies Dominate in the Range up to Nano Sizes

Jun Ma,<sup>†</sup> Xizi Cao,<sup>†</sup> Xiaopeng Xing<sup>\*,†</sup>, Xuefeng Wang,<sup>†</sup> Joel H. Parks,<sup>‡</sup>

<sup>†</sup>Department of Chemistry, Tongji University, 1239 Siping Road, Shanghai, 200092,  
China

<sup>‡</sup>Rowland Institute at Harvard, Cambridge, Massachusetts 02142, USA

---

\*Authors to whom correspondence should be addressed. Tel.: +86-021-65981097;  
Fax: +86-021-65981097; Email: xingxp@tongji.edu.cn

## Supporting Materials

Figure SP

The mass spectra showing reaction of  $\text{Au}_2^-$  with  $\text{O}_2$  under the same condition described in the manuscript. The linear fitting of  $-\ln(I/I_0)$  vs  $\text{O}_2$  flow rates get a slope representing the relative decay rate. The  $k_{\text{III}}$  rate for reaction of  $\text{Au}_2^-$  with  $\text{O}_2$  in pure helium gas is estimated to be around  $5.8 \times 10^{-28} \text{ cm}^6\text{s}^{-1}$  in ref [23] of the manuscript. The ratio of the slope and the  $k_{\text{III}}$  value was used to calibrate reaction rate constants of other sizes. For example, the slope of  $\text{Ag}_{10}^-$  is 21.9 and its  $k_{\text{III}}$  is calibrated to be around  $6 \times 10^{-26} \text{ cm}^6\text{s}^{-1}$ .

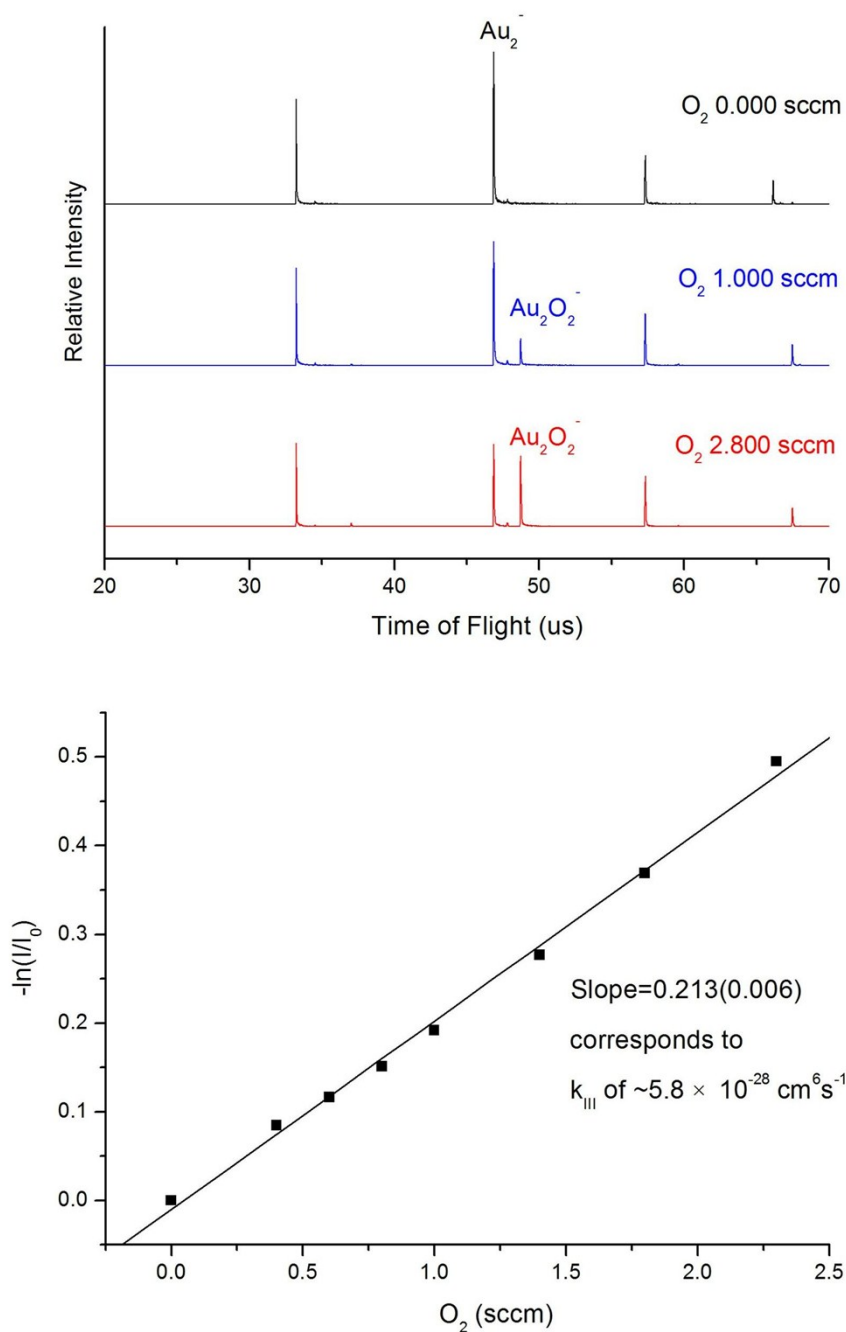

Supplement: c5cp06116d1.pdf [file c5cp06116d1.pdf]
